# Supplementary material
Source: Springer Nature journal article supplement (https://www.springermedizin.de/resource/supplementary/12889_2012_4357_MOESM1_ESM.pdf/9492020)

Sero-incidence per 1000 person-years

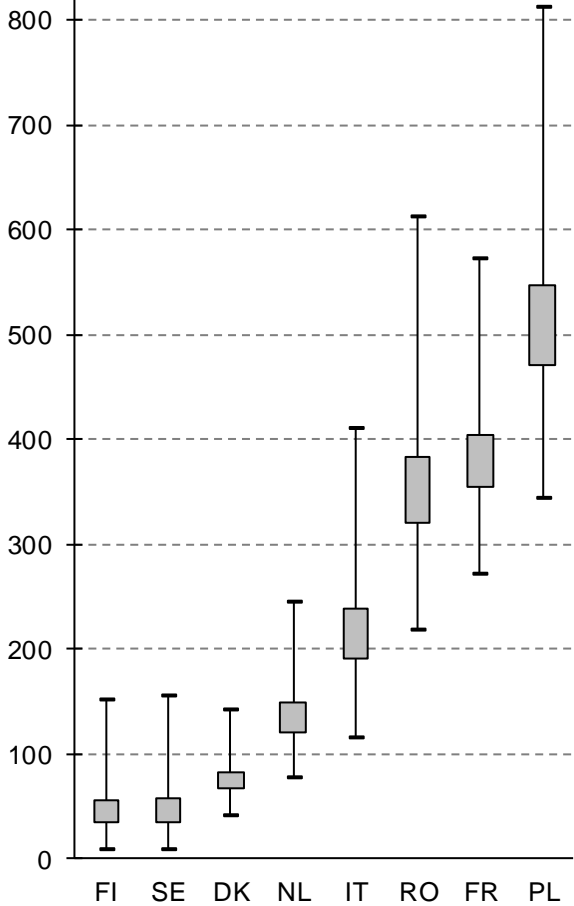

Supplement: MOESM1 [file 9492020]
